# Supplementary material for: Chest beats as an honest signal of body size in male mountain gorillas (Gorilla beringei beringei)
Source: PubMed Central journal article supplement (PMC8032651; doi:10.1038/s41598-021-86261-8), 2021-04-08
Supplement: 41598_2021_86261_MOESM1_ESM.pdf [file 41598_2021_86261_MOESM1_ESM.pdf]

**Chest beats as an honest signal of body size in male mountain gorillas**  
**(*Gorilla beringei beringei*)**

Edward Wright<sup>1\*</sup>, Sven Grawunder<sup>1,2</sup>, Eric Ndayishimiye<sup>3</sup>, Jordi Galbany<sup>4,5</sup>, Shannon C. McFarlin<sup>4</sup>, Tara S. Stoinski<sup>3</sup>, Martha M. Robbins<sup>1</sup>

<sup>1</sup>Max Planck Institute for Evolutionary Anthropology, Deutscher Platz 6, 04103, Leipzig, Germany.

<sup>2</sup>Goethe Universität Frankfurt am Main, Germany.

<sup>3</sup>Dian Fossey Gorilla Fund International, Atlanta, Georgia, USA.

<sup>4</sup>Department of Anthropology, Center for the Advanced Study of Human Paleobiology, The George Washington University, Washington, District of Columbia, USA.

<sup>5</sup>Department of Clinical Psychology and Psychobiology, University of Barcelona, Barcelona, Spain.

\* [edward\\_wright@eva.mpg.de](mailto:edward_wright@eva.mpg.de)

## Supplementary Information

### Supplementary Note

We also fitted the models presented in the main text with crest-back score, a composite measure combining back breadth and crest height, instead of back breadth alone. Crest-back score was shown to positively correlate with dominance rank and reproductive success in male mountain gorillas<sup>1</sup>. The results with crest-back score were essentially the same as those with back breadth (Table S1).

Table S1. Full null model comparisons for the models presented in the main text fitted with crest-back score, instead of back breadth.

| Model               | $\chi^2$ | <i>P</i> |
|---------------------|----------|----------|
| Peak frequency      | 4.223    | 0.040    |
| Chest beat duration | 0.167    | 0.683    |
| Number of beats     | 0.096    | 0.757    |
| Beat rate           | 0.019    | 0.891    |

The degrees of freedom for all models was 1.

### Supplementary Methods

Peak frequency estimation was used by means of the PRAAT software<sup>2</sup>. Here for every data point the annotated chest beat was extracted 5 ms before and 25 ms after the beat onset. Beforehand the signal was bandpass-filtered (50 to 2500Hz) using a rectangular band filter in order to exclude influence of unrelated low- and high-frequency noise bands. The FFT spectrum (4441-bin FFT size) was then calculated and turned into a long term average spectra (LTAS) with a general bin width of 5.405 Hz (frequency resolution = 24000Hz/4441bins). The frequency step with maximal power spectral density (in dB) was then determined as *peak frequency* within the LTAS (Fig. S1).

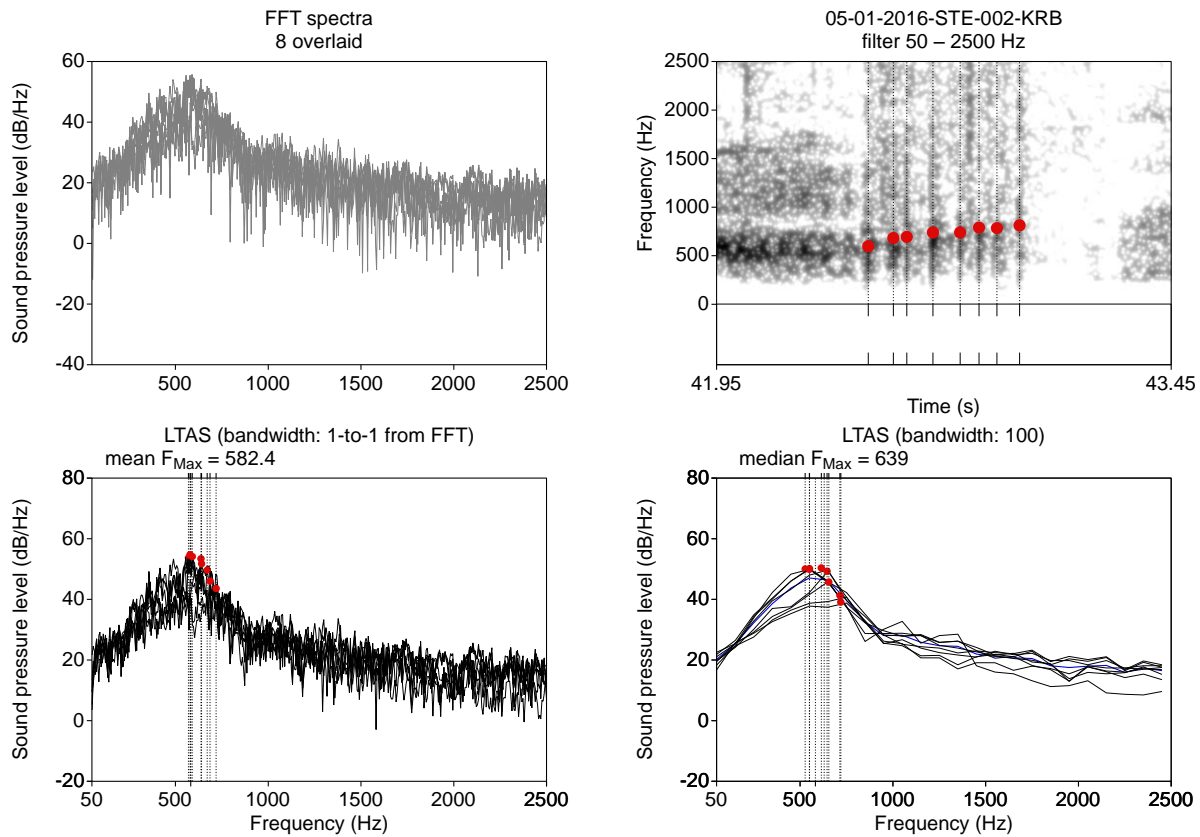

Figure S1. The two panels on the left side illustrate the FFT and derived LTAS spectra; red dots mark the positions of the peak frequencies; blue thick line (in lower right panel) corresponds to an averaged LTAS spectrum

## References

1. Wright, E. *et al.* Male body size, dominance rank and strategic use of aggression in a group-living mammal. *Anim. Behav.* **151**, 87–102 (2019).
2. Boersma, P. & Weenink, D. Praat: doing phonetics by computer [Computer program] (2020). Version 6.1.36, retrieved 6 December 2020 from <http://www.praat.org/>.
